# Supplementary material for: Exploring the barriers of adherence to dietary recommendations among patients with type 2 diabetes: A qualitative study in Iran
Source: PubMed Central journal article supplement (PMC7544840; doi:10.1002/nop2.558), 2020-07-16
Supplement: NOP2-7-1735-s001.pdf [file NOP2-7-1735-s001.pdf]

## Consolidated criteria for reporting qualitative studies (COREQ): 32-item checklist

**YOU MUST PROVIDE A RESPONSE FOR ALL ITEMS. ENTER N/A IF NOT APPLICABLE**

| Topic                                          | Item No. | Guide questions/description                                                                                                                              | Reported on page No |
|------------------------------------------------|----------|----------------------------------------------------------------------------------------------------------------------------------------------------------|---------------------|
| <b>Domain 1: Research team and reflexivity</b> |          |                                                                                                                                                          |                     |
| Personal Characteristics                       |          |                                                                                                                                                          |                     |
| Inter viewer/facilitator                       | 1        | Which author/s conducted the interview or focus group?                                                                                                   | 40 ,page 4          |
| 2. Credentials                                 | 2        | What were the researcher's credentials? E.g. PhD, MD                                                                                                     | In title page       |
| 3. Occupation                                  | 3        | What was their occupation at the time of the study?                                                                                                      | In title page       |
| 4. Gender                                      | 4        | Was the researcher male or female?                                                                                                                       | In title page       |
| 5. Experience and training                     | 5        | What experience or training did the researcher have?                                                                                                     | 33, page 5          |
| Relationship with participants                 |          |                                                                                                                                                          |                     |
| 6. Relationship established                    | 6        | Was a relationship established prior to study commencement?                                                                                              | N/A                 |
| 7. Participant knowledge of the interviewer    | 7        | What did the participants know about the researcher? e.g. personal goals, reasons for doing the research                                                 | 3 ,page 4           |
| 8. Interviewer characteristics                 | 8        | What characteristics were reported about the inter viewer/facilitator? e.g. Bias, assumptions, reasons and interests in the research topic               | 39-41, page 5       |
| <b>Domain 2: study design</b>                  |          |                                                                                                                                                          |                     |
| Theoretical framework                          |          |                                                                                                                                                          |                     |
| 9. Methodological orientation and Theory       | 9        | What methodological orientation was stated to underpin the study? e.g. grounded theory, discourse analysis, ethnography, phenomenology, content analysis | 41-42, page 3       |
| Participant selection                          |          |                                                                                                                                                          |                     |
| 10. Sampling                                   | 10       | How were participants selected? e.g. purposive, convenience, consecutive, snowball                                                                       | 46-47, page 3       |
| 11. Method of approach                         | 11       | How were participants approached? e.g. face-to-face, telephone, mail, email                                                                              | 22-23, page 4       |
| 12. Sample size                                | 12       | How many participants were in the study?                                                                                                                 | 22, page 4          |
| 13. Non-participation                          | 13       | How many people refused to                                                                                                                               | 14, page 4          |

|                                        |           |                                                                                                                                 |                                                 |
|----------------------------------------|-----------|---------------------------------------------------------------------------------------------------------------------------------|-------------------------------------------------|
|                                        |           | participate or dropped out? Reasons?                                                                                            |                                                 |
| <b>Setting</b>                         |           |                                                                                                                                 |                                                 |
| 14. Setting of data collection         | <b>14</b> | Where was the data collected? e.g. home, clinic, workplace                                                                      | 23-24, page 4                                   |
| 15. Presence of non-participants       | <b>15</b> | Was anyone else present besides the participants and researchers?                                                               | 43, page 4                                      |
| 16. Description of sample              | <b>16</b> | What are the important characteristics of the sample? e.g. demographic data, date                                               | 48, page 3                                      |
| <b>Data collection</b>                 |           |                                                                                                                                 |                                                 |
| 17. Interview guide                    | <b>17</b> | Were questions, prompts, guides provided by the authors? Was it pilot tested?                                                   | 49, page 4                                      |
| 18. Repeat interviews                  | <b>18</b> | Were repeat inter views carried out? If yes, how many?                                                                          | 3-4, page 5, five of the cases                  |
| 19. Audio/visual recording             | <b>19</b> | Did the research use audio or visual recording to collect the data?                                                             | 44-45, page 4                                   |
| 20. Field notes                        | <b>20</b> | Were field notes made during and/or after the inter view or focus group?                                                        | 33-36, page 4                                   |
| 21. Duration                           | <b>21</b> | What was the duration of the inter views or focus group?                                                                        | 29, page 4                                      |
| 22. Data saturation                    | <b>22</b> | Was data saturation discussed?                                                                                                  | 8-9, page 4                                     |
| 23. Transcripts returned               | <b>23</b> | Were transcripts returned to participants for comment and/or correction?                                                        | 51-53, page 6                                   |
| <b>Domain 3: analysis and findings</b> |           |                                                                                                                                 |                                                 |
| <b>Data analysis</b>                   |           |                                                                                                                                 |                                                 |
| 24. Number of data coders              | <b>24</b> | How many data coders coded the data?                                                                                            | 25, page 5                                      |
| 25. Description of the coding tree     | <b>25</b> | Did authors provide a description of the coding tree?                                                                           | 29, page 5                                      |
| 26. Derivation of themes               | <b>26</b> | Were themes identified in advance or derived from the data?                                                                     | 29-30, page 5                                   |
| 27. Software                           | <b>27</b> | What software, if applicable, was used to manage the data?                                                                      | 22, page 5                                      |
| 28. Participant checking               | <b>28</b> | Did participants provide feedback on the findings?                                                                              | N/A                                             |
| <b>Reporting</b>                       |           |                                                                                                                                 |                                                 |
| 29. Quotations presented               | <b>29</b> | Were participant quotations presented to illustrate the themes/findings? Was each quotation identified? e.g. participant number | Yes, Throughout the results section             |
| 30. Data and findings consistent       | <b>30</b> | Was there consistency between the data presented and the findings?                                                              | Yes                                             |
| 31. Clarity of major themes            | <b>31</b> | Were major themes clearly presented in the findings?                                                                            | Yes, Throughout the results section             |
| 32. Clarity of minor themes            | <b>32</b> | Is there a description of diverse cases or discussion of minor themes?                                                          | Yes, throughout the section of and "Discussion" |
